# Occurrence of emerging contaminants in environmental surface waters and their analytical methodology – a review

J. Manuel Galindo-Miranda, Cecilia Guízar-González, Elías J. Becerril-Bravo, Gabriela Moeller-Chávez , Elizabeth León-Becerril and Ramiro Vallejo-Rodríguez

## ABSTRACT

A new concern about surface water quality is the occurrence of emerging contaminants that have been recognized as a new class of water contaminants such as antibiotics, hormones, pesticides, personal care products and pharmaceutical products. The occurrence of these contaminants in the aquatic environment and especially in surface water is a serious concern because this is usually the source of water for drinking water treatment plants (DWTP). This review provides a summary of the occurrence and the analytical methodology (extraction process, chromatography analysis, detection systems and ionization source) of emerging contaminant analysis in surface waters including rivers, lakes, creeks and wetlands for their analysis.

**Key words** | analytical methodology, chromatography analysis, emerging contaminants, extraction process, surface water quality

**J. Manuel Galindo-Miranda**  
**Cecilia Guízar-González**  
**Elizabeth León-Becerril**  
**Ramiro Vallejo-Rodríguez** (corresponding author)  
Unidad de Tecnología Ambiental,  
Centro de Investigación y Asistencia en Tecnología  
y Diseño del Estado de Jalisco, (CIATEJ),  
Ave. Normalistas 800 Colinas de la normal, 44270,  
Guadalajara Jalisco,  
México  
E-mail: [rvallejo@ciatej.mx](mailto:rvallejo@ciatej.mx)

**Elías J. Becerril-Bravo**  
Instituto de Ingeniería,  
Universidad Nacional Autónoma de México,  
(UNAM) Circuito escolar s/n, Ciudad  
Universitaria,  
Delegación Coyoacán, CDMX, 04510,  
México

**Gabriela Moeller-Chávez**  
Universidad Politécnica del Estado de Morelos,  
(UPEMOR),  
Boulevard Cuauhnáhuac 566 Lomas del Texcal,  
Jiutepec Morelos, 62550,  
México

## INTRODUCTION

The occurrence of emerging contaminants (ECs), also called micropollutants, is derived from different sources that could be anthropogenic as well as natural substances. These contaminants in waters are commonly at trace concentrations, ranging from a few nanograms per litre (ng/L) to several micrograms per litre ( $\mu\text{g/L}$ ) (Luo *et al.* 2014). The presence of ECs in surface waters is mainly attributed to discharges of wastewater (Petrie *et al.* 2015; Ebele *et al.* 2017) because conventional wastewater treatment, based on activated sludge processes, exhibits limitations on their removal (Tran *et al.* 2018). The ECs include a long list of products used daily such as antibiotics, hormones, pesticides, personal care products (PCPs), and pharmaceuticals.

In particular, the occurrence of ECs in surface water could be a troubling problem when this is used for drinking water (Riva *et al.* 2018). These contaminants have been detected globally in many natural water systems including rivers, lakes and reservoirs (Wang *et al.* 2011; Lai *et al.* 2016; Wanda *et al.* 2017; Rivera-Jaimes *et al.* 2018). Since the end of the 19th century, drinking water supply has focused mainly on quality standards of microbial risk (WHO 2006), nevertheless there is a new concern about safe water access, that is, harmful chemicals in small amounts such as ECs. This contamination threatens surface water resources since water quality deterioration has become a serious concern worldwide due to the increase in pollution (John *et al.* 2014; WHO 2016; Wu *et al.* 2017).

The number of ECs in the aquatic environment is growing continuously every year (Agüera *et al.* 2013) and its transformation products (TPs) continue to be an important aspect in this topic because TPs can often be more toxic than the parent compounds (Richardson & Ternes 2018). Considering the impact of these contaminants on aquatic life and human health, data analysis of these contaminants is required. This valuable and high-quality information can be supplied by sensible and selective analytical methods. Nevertheless there is still a gap in knowledge of occurrence, fate and effects in the environment. In this context, this paper investigated the data of EC occurrence in environmental surface waters and their detection methodology.

## EXTRACTION PROCESS

ECs are normally present at trace concentrations in surface waters requiring an extraction process called solid phase extraction (SPE). SPE is often needed to concentrate the target compounds for analysis. This technique is used by various researchers around the world. It follows USEPA method 3535A (USEPA 2007) and it is used in sample preparation for different purposes to remove interferences, for concentration or trace enrichment of the analytes, desalting and sample storage and transport (Agilent Technologies 2013).

The procedures for SPE, very similar for most organic analytes, are as follows: sample preparation, pH adjustment, setting up the extraction apparatus and information regarding extract concentration generally apply to all target analytes (USEPA 2007). Regarding the overall extraction step, SPE and solid phase microextraction (SPME) continue to be the main techniques for application in sample preparation before chromatographic analysis of ECs. SPME techniques have been developed not only for reduction of solvent and instrumentation extraction but also to improve and facilitate rapid and convenient sample preparation (Pawliszyn 2012).

According to the literature consulted, the most representative technology for extraction in the current analysis of ECs is SPE. This technique is used in multiple configuration columns for the detection of these contaminants. In the

available literature on the application of SPE the hydrophilic-lipophilic-balanced (HLB) cartridge is widely used in the study of different CE (Celle-Jeanton *et al.* 2014; Osorio *et al.* 2016; Rivera-Jaimes *et al.* 2018). Otherwise SPME technology has been employed by Regueiro *et al.* (2009) and Beceiro-González *et al.* (2007) to develop a methodology for the analysis of personal care products and pesticides in surface waters, respectively.

A new feature regarding SPME is the automation of the process, e.g. a method of automated SPME-GC-MS for the determination of pesticides in surface and ground water has been validated by Rodríguez-Lafuente *et al.* (2016). Also, new SPE materials have been developed as in fabric phase sorptive extraction (FPSE), a new device of very high sorbent loading in an ultra-thin coating (Kabir *et al.* 2017). These innovations represent new possibilities in the analysis of ECs in complex environmental samples such as those of surface waters.

## CHROMATOGRAPHY ANALYSIS

A rigorous evaluation of environmental pollution of ECs requires constant innovation in the analytical methodology. Moreover, the detection of ECs in the environment can be a challenge as they typically occur at trace concentrations. This difficulty encourages the development of analytical methods that are highly sensitive and selective. The principal analytical techniques for EC monitoring are mainly based on gas chromatography (GC) and liquid chromatography (LC) coupled to mass spectrometry (MS). In recent years, the tendency for analysis of ECs through liquid chromatography-tandem mass spectrometry (LC-tandem-MS) has increased. The extensive literature available confirms this choice of analysis for many classes of ECs in environmental samples, including surface waters (Spongberg *et al.* 2011; Afonso-Olivares *et al.* 2013; Celle-Jeanton *et al.* 2014; Torres *et al.* 2015; Aparicio *et al.* 2017; Munz *et al.* 2017; Wilkinson *et al.* 2017; Hermes *et al.* 2018; Rivera-Jaimes *et al.* 2018). This key technique for environmental analysis allows the detection of a wide range of polar and non-volatile compounds and can reduce sample preparation (Rosen 2007). Mass spectrometers use an ion source to generate ions with positive or negative charges (see

Ionization sources section). The ions then travel through the mass analyser and arrive at different parts of the detector according to their mass/charge ( $m/z$ ) ratio, and hence ions can be identified (Ho *et al.* 2003).

As for gas chromatography–mass spectrometry (GC-MS), it remains a popular methodology since it is still considered a highly efficient separation technique, but lengthy sample derivatization processes are often required to ensure analyte volatility (Kanani *et al.* 2008), for instance derivatization or chemical modification. A great deal of literature about the monitoring of ECs in surface water that employs this technique (Bu *et al.* 2015; Kong *et al.* 2015; Selvaraj *et al.* 2015; Terzopoulou *et al.* 2015; Wang *et al.* 2015; Edjere *et al.* 2016; El-Gawad 2016) supports its analytical efficiency. Furthermore, GC still offers some clear advantages over LC, for instance higher separation efficiency and lower costs without the problems associated with the matrix effects of LC-MS/MS (Reemtsma & Quintana 2006).

The newest development to improve the separation of complex mixtures is multi-dimensional chromatography with dimensions based on different separation mechanisms (Leonhardt *et al.* 2015). Comprehensive two-dimensional gas chromatography (GC × GC) has been demonstrated as a technique capable of enhanced separation of compounds within a complex matrix (Organtini *et al.* 2014; Prebihalo *et al.* 2015) such as a sample of environmental water represents. Hence, many successful applications of GC × GC for EC detection in surface water have been addressed (Jover *et al.* 2009; Gómez *et al.* 2011; Wanda *et al.* 2017). The basic experiment of this technique comprises the connection of two chromatographic columns with complementary polarity that together enhance the separation capacity of the arrangement; the columns are interfaced through a modulator device, which effectively decouples elution on each column (Edwards *et al.* 2011; Tranchida *et al.* 2011).

Another aim in the methodologies for ECs is to improve the time for analysis and reduce the consumption of solvents. In this sense, a suitable choice is the use of chromatographic systems at very high pressure: ultra-high-performance liquid chromatography (UHPLC). This technique has gained importance in the analysis of ECs and many studies have employed this technique (Gros *et al.* 2012, 2013; Ma *et al.* 2016; Petrie *et al.* 2016; Yang *et al.*

2018). The use of this very high pressure together with 1.7- $\mu\text{m}$ -particle-size columns allows savings on time and solvent consumption, without altering or even with improvements to sensitivity and peak resolution (Guillarme *et al.* 2007; Chauveau-Duriot *et al.* 2010).

## DETECTION SYSTEMS

High-resolution mass spectrometry (HRMS) combined with high-performance liquid chromatography is a technique that plays a role in the investigation of environmental processes and in the study of the fate of pollutants (Calza *et al.* 2013). One lauded benefit of HRMS is the possibility to retrospectively process data for compounds that has led to the archiving of HRMS data (Alygizakis *et al.* 2018). However the most important feature of HRMS is the capacity to determine the molecular formulas of the analytes from accurate mass measurements (Picó & Barceló 2015).

With regard to mass analysers, specifically hybrid instruments, QqToF, QqLIT and orbitrap for example are becoming more popular, because of their capabilities in achieving accurate mass measurements and acquiring indispensable qualitative information in the form of full-scan spectra (Petrovic & Barceló 2013). The actual literature on the analysis of ECs in surface waters shows the application of these hybrid mass analysers (Gros *et al.* 2012, 2013; Pítarch *et al.* 2016; Gago-Ferrero *et al.* 2017).

Nevertheless, MS may not be the only detection system for the analysis, from the large literature consulted in this review. Other methodologies based on different detection systems for the analysis of ECs have been recently published. Salvatierra-Stamp *et al.* (2015) reported EC analysis in water samples, including one river through a LC method coupled to a photodiode array detector (PAD).

## IONIZATION SOURCES

Different types of ion sources commonly used include, among others, electrospray ionization (ESI) and electron impact (EI). EI is by far the most commonly used ionization method for GC-MS instruments. Almost all the GC-MS methodologies for the analysis of ECs consulted in this

review employed this ionization source. Nevertheless, ESI is today the most widely used ionization technique in chemical and biochemical analysis for liquid form samples because it ionizes molecules directly from the liquid phase (Wilm 2011). This soft ionization source uses electrical energy to assist the transfer of ions from solution into the gaseous phase without fragmentation (Ho *et al.* 2003; Banerjee & Mazumdar 2012). The extensive body of knowledge about the occurrence of ECs in surface waters confirms that this ionization source is the most widely used coupled to LC devices (Spongberg *et al.* 2011; Gros *et al.* 2013; Osorio *et al.* 2016; Hermes *et al.* 2018; Rivera-Jaimes *et al.* 2018).

## OCCURRENCE OF EMERGING CONTAMINANTS IN SURFACE WATERS AND THEIR ANALYTICAL METHODOLOGY

Despite the occurrence of ECs in surface water, numerous contaminants are still continuously released as a result of anthropogenic activities such as industry, agriculture and household activities and these may affect human health via exposure to drinking water (Hartmann *et al.* 2018). For this reason, the development of sensitive and reliable analytical techniques is essential for monitoring the occurrence of ECs in surface waters. A comparative analysis regarding the occurrence of ECs including pharmaceuticals, PCPs, pesticides, antibiotics and hormones in surface waters from several waterbodies and the methodology of detection are presented in this section. Table 1 summarizes the main analytical methodologies (extraction process, chromatography instrument, ionization mode and detection system) employed for the detection of diverse ECs in surface waters.

### Pharmaceuticals

In recent years, the growing occurrence of pharmaceuticals (both human and veterinary) has been referred to as one of the most imperative environmental concerns (Carmona *et al.* 2014; Hernández *et al.* 2014; Kosma *et al.* 2014). It is known that these contaminants occur widely in the environment of industrialized countries (Beek *et al.* 2016) as a result of the significant volume of pharmaceuticals that are used by humans for the treatment of diseases, injuries, or illnesses.

In surface waters of the USA, Deo (2014) (various authors, various methodologies) reported the occurrence of 93 pharmaceuticals including: antibiotics, antidepressants, antihypertensives, analgesics, and others. Félix-Cañedo *et al.* (2013) (SPE-GC-EI-MS/MS-tandem) reported the presence of pharmaceuticals in Mexico City's surface waters including ibuprofen, diclofenac, naproxen, gemfibrozil and ketoprofen, and also addressed the higher concentration of these pharmaceuticals than those found in groundwater. In the middle of Lake Geneva, one of the largest European lakes, 14 pharmaceuticals were regularly detected in concentrations up to 0.37 µg/L for 6 years (Chèvre 2014) (various authors, various methodologies). In surface waters such as streams, ponds and lakes of India the occurrence of 15 pharmaceuticals has been detected (Gani & Kazmi 2016) (various authors, various methodologies). Nannou *et al.* (2015) elucidated the occurrence of 23 pharmaceuticals at different sample points along the river Kalamas and Lake Pamvotis region of Epirus, Greece (SPE-LC-ESI-MS). Similar observations were reported in the surface waters of the river Allier, France, detecting nine pharmaceuticals (Celle-Jeanton *et al.* 2014) (SPE-UHPLC-ESI-MS-Q-ToF) and in Lake Dongting, China, 12 pharmaceuticals were identified at concentrations of a few ng/L to a hundred ng/L (Ma *et al.* 2016) (SPE-UHPLC-ESI-MS-Q-ToF).

In summary, human pharmaceuticals are released in aquatic systems due to anthropogenic activities; therefore, these contaminants have been detected in many surface waters and the highest concentrations are found in densely urbanized areas, where the aquatic system is highly impacted by urban wastewater (Margot *et al.* 2015). The measured concentrations of some relevant pharmaceuticals in different surface waters are listed in Table 2.

### Personal care products

PCPs include ingredients found in shampoos, washing lotions, skin care products, dental care products, sunscreen agents, cosmetics, perfumes etc. (Margot *et al.* 2015). Esters of *p*-hydroxybenzoic acid or parabens are a class of chemicals widely used as preservatives in cosmetics and pharmaceuticals (Guo *et al.* 2013). These compounds include bisphenol A and other esters such as methylparaben, ethylparaben, propylparaben etc. that have been used for decades

**Table 1** | Analytical methodologies employed for the detection of diverse ECs in surface waters

| Extraction process | Analytical methodology (chromatography instrument-ionization source-detection system) | Compounds analysed                                                                              | Reference                                                                                                                                                                                                                                    |
|--------------------|---------------------------------------------------------------------------------------|-------------------------------------------------------------------------------------------------|----------------------------------------------------------------------------------------------------------------------------------------------------------------------------------------------------------------------------------------------|
| SPE                | HPLC-ESI-MS/MS (tandem)                                                               | Pharmaceuticals, hormones, PCPs, plasticizers and perfluorinated compounds                      | Spongberg <i>et al.</i> (2011); Wang <i>et al.</i> (2011); Torres <i>et al.</i> (2015); Lai <i>et al.</i> (2016); Wilkinson <i>et al.</i> (2017); Rivera-Jaimes <i>et al.</i> (2018)                                                         |
| SPE                | HPLC-ESI-MS (Orbitrap)                                                                | Pharmaceuticals                                                                                 | Calza <i>et al.</i> (2013)                                                                                                                                                                                                                   |
| SPE                | HPLC-PAD                                                                              | Eight ECs including carbamazepine, bisphenol A, 17 $\alpha$ -ethinylestradiol and triclosan     | Salvatierra-Stamp <i>et al.</i> (2015)                                                                                                                                                                                                       |
| SPE                | UHPLC-ESI-MS/MS (tandem)                                                              | Pharmaceuticals, PCPs, illicit drugs and pesticides                                             | Carmona <i>et al.</i> (2014); Celle-Jeanton <i>et al.</i> (2014); De Gerónimo <i>et al.</i> (2014); Ma <i>et al.</i> (2016); Paíga <i>et al.</i> (2016); Osorio <i>et al.</i> (2016); Petrie <i>et al.</i> (2016); Yang <i>et al.</i> (2018) |
| SPE                | UHPLC-ESI-MS (QToF)                                                                   | Pharmaceuticals, PCPs, artificial sweeteners, pesticides, and perfluoroalkyl substances         | Pitarch <i>et al.</i> (2016); Gago-Ferrero <i>et al.</i> (2017)                                                                                                                                                                              |
| SPE                | UHPLC-ESI-MS (QqLIT)                                                                  | Pharmaceuticals and antibiotics                                                                 | Gros <i>et al.</i> (2012, 2013)                                                                                                                                                                                                              |
| SPE                | GC-EI-MS/MS (tandem)                                                                  | Pharmaceuticals, PCPs, antioxidants, pesticides, phenols, aromatic hydrocarbons etc.            | Félix-Cañedo <i>et al.</i> (2013); Kong <i>et al.</i> (2015); Terzopoulou <i>et al.</i> (2015)                                                                                                                                               |
| SPE                | GCxGC-MS (ToF)                                                                        | Pharmaceuticals, plasticizers, pesticides, benzothiazoles, benzotriazoles and benzosulfonamides | Jover <i>et al.</i> (2009); Wanda <i>et al.</i> (2017); Glinski <i>et al.</i> (2018)                                                                                                                                                         |
| SPME               | GC-EI-MS (tandem)                                                                     | Pesticides, parabens, triclosan and related chlorophenols                                       | Beceiro-González <i>et al.</i> (2007); Regueiro <i>et al.</i> (2009)                                                                                                                                                                         |
| SBSE               | HPLC-ESI-MS/MS (tandem)                                                               | Polar and non-polar emerging and priority pollutants                                            | Aparicio <i>et al.</i> (2017)                                                                                                                                                                                                                |
| SBSE               | GCxGC-MS (ToF)                                                                        | Priority and emerging contaminants including: PCPs, pesticides, and aromatic hydrocarbons       | Gómez <i>et al.</i> (2011)                                                                                                                                                                                                                   |
| LLE                | HPLC- FD                                                                              |                                                                                                 |                                                                                                                                                                                                                                              |

EI: Electron impact; ESI: Electrospray ionization; FD: Fluorescence detection; GC: Gas chromatography; GCxGC: Two-dimensional gas chromatography; HPLC: High-performance liquid chromatography; LC: Liquid chromatography; LLE: Liquid-liquid extraction; MS: Mass spectrometry; PAD: Photodiode array detector; Q: Quadrupole; QqLIT: Quadrupole linear ion trap; SBSE: Stir bar sorptive extraction; SPE: Solid phase extraction; SPME: Solid phase microextraction; UHPLC: Ultra-high-performance liquid chromatography; UPLC: Ultra-performance liquid chromatography; ToF: Time of flight.

(Czarczyńska-Goślińska *et al.* 2017). The occurrence of these compounds in surface water has been determined in several studies (Regueiro *et al.* 2009; Yamamoto *et al.* 2011; Renz *et al.* 2013).

Another compound used as an antimicrobial in soaps, deodorants, skin creams, toothpaste and plastics is triclosan, a biphenyl ether (McAvoy *et al.* 2002) that has been identified in surface water in many works of the consulted literature (Nishi *et al.* 2008; Lyndall *et al.* 2010; Bu *et al.* 2015; Petrie *et al.* 2016). Nonylphenol is an ultimate degradation product of nonylphenol polythoxylates that are also

used in cleaning and industrial processes (Mao *et al.* 2012). This compound have been detected in some surface water (Jin *et al.* 2013; Kong *et al.* 2015; Terzopoulou *et al.* 2015; Cherniaev *et al.* 2016). The measured concentrations in surface water of bisphenol A, nonylphenol and triclosan, which are widely used in PCPs, are listed in Table 3.

### Pesticides

According to their use, pesticides are classified generally into four categories: fungicides, herbicides, bactericides,



**Table 2** | Occurrence of some relevant pharmaceuticals in different surface waters: main concentration and/or the highest concentration (in brackets)

| Compound      | Concentration (ng/L)    | Surface water location                                     | Analytical methodology             | Reference                          |
|---------------|-------------------------|------------------------------------------------------------|------------------------------------|------------------------------------|
| Acetaminophen | 123 (156)               | Pamvotis Lake and Kalamas River (Greece)                   | SPE-LC-ESI-MS                      | Nannou <i>et al.</i> (2015)        |
|               | 243                     | Onya River (Spain)                                         | SPE-HPLC-ESI-MS (QqLIT)            | Gros <i>et al.</i> (2012)          |
|               | 3,422 (4,460)           | Apatlaco River (Mexico)                                    | SPE-HPLC-ESI-MS/MS (tandem)        | Rivera-Jaimes <i>et al.</i> (2018) |
|               | 20.8                    | Hogsmill, Chertsey Bourne, and Blackwater Rivers (England) | SPE-HPLC-ESI-MS/MS (tandem)        | Wilkinson <i>et al.</i> (2017)     |
|               | 17.8                    | Dongjiang River (China)                                    | SPE-UHPLC-ESI-MS/MS (tandem)       | Yang <i>et al.</i> (2018)          |
|               | 56                      | Missouri River (USA)                                       | SPE-HPLC-ESI-MS/MS (tandem)        | Wang <i>et al.</i> (2011)          |
| Carbamazepine | 2.9 (5.8)               | Allier River (France)                                      | SPE-UHPLC-ESI-MS/MS (tandem)       | Celle-Jeanton <i>et al.</i> (2014) |
|               | 50.79 (63.36)           | Llobregat River (Spain)                                    | SPE-LC-ESI-MS (QqLIT)              | Osorio <i>et al.</i> (2012)        |
|               | 29                      | Mkomazane River (South Africa)                             | SPE-GCxGC-MS (ToF)                 | Wanda <i>et al.</i> (2017)         |
|               | 31.7 (214)              | Lis River (Portugal)                                       | SPE-UHPLC-ESI-MS/MS (tandem)       | Paíga <i>et al.</i> (2016)         |
|               | 113 (325)               | Pamvotis Lake and Kalamas River (Greece)                   | SPE-LC-ESI-MS                      | Nannou <i>et al.</i> (2015)        |
|               | 16                      | Grand River (Canada)                                       | SPE-LC-ESI-MS (tandem)             | Hao <i>et al.</i> (2006)           |
| Diclofenac    | 49 (3,462)              | Turia River (Spain)                                        | SPE-UHPLC-ESI-MS/MS (tandem)       | Carmona <i>et al.</i> (2014)       |
|               | (260)                   | Fyris River (Sweden)                                       | SPE-UHPLC-ESI-MS (QToF)            | Gago-Ferrero <i>et al.</i> (2017)  |
|               | (52)                    | Onyar River (Spain)                                        | SPE-HPLC-ESI-MS (QqLIT)            | Gros <i>et al.</i> (2012)          |
|               | 40 (230)                | Dongting Lake (China)                                      | SPE-UHPLC-ESI-MS/MS (tandem)       | Ma <i>et al.</i> (2016)            |
|               | 146 (457)               | Pamvotis Lake and Kalamas River (Greece)                   | SPE-LC-ESI-MS                      | Nannou <i>et al.</i> (2015)        |
| Ibuprofen     | 1,115 (1,398)           | Apatlaco River (Mexico)                                    | SPE-HPLC-ESI-MS/MS (tandem)        | Rivera-Jaimes <i>et al.</i> (2018) |
|               | 1,830                   | Rakkolanjoki River (Finland)                               | SPE-LC-ESI-MS/MS (tandem)          | Meierjohann <i>et al.</i> (2016)   |
|               | 380                     | Onya River (Spain)                                         | SPE-HPLC-ESI-MS (QqLIT)            | Gros <i>et al.</i> (2012)          |
|               | 730 (1,106)             | Apatlaco River (Mexico)                                    | SPE-HPLC-ESI-MS/MS (tandem)        | Rivera-Jaimes <i>et al.</i> (2018) |
|               | 116                     | Dongjiang River (China)                                    | SPE-UHPLC-ESI-MS/MS (tandem)       | Yang <i>et al.</i> (2018)          |
|               | 37.5                    | Mississippi River (USA)                                    | SPE-HPLC-ESI-MS/MS (tandem)        | Wang <i>et al.</i> (2011)          |
| Naproxen      | 53.7 (1,317)            | Lis River (Portugal)                                       | SPE-UHPLC-ESI-MS/MS (tandem)       | Paíga <i>et al.</i> (2016)         |
|               | 1,687                   | Rakkolanjoki River (Finland)                               | SPE-LC-ESI-MS/MS (tandem)          | Meierjohann <i>et al.</i> (2016)   |
|               | 14.24 (114.04)          | Ebro River (Spain)                                         | SPE-UHPLC-ESI-MS/MS (tandem)       | Osorio <i>et al.</i> (2016)        |
|               | 2.95 (12.21)            | Júcar River (Spain)                                        | SPE-UHPLC-ESI-MS/MS (tandem)       | Osorio <i>et al.</i> (2016)        |
|               | 3.9                     | Dongting Lake (China)                                      | SPE-UHPLC-ESI-MS/MS (tandem)       | Ma <i>et al.</i> (2016)            |
|               | 278                     | Turia River (Spain)                                        | SPE-UHPLC-ESI-MS/MS (tandem)       | Carmona <i>et al.</i> (2014)       |
| 3,990 (4,820) | Apatlaco River (Mexico) | SPE-HPLC-ESI-MS/MS (tandem)                                | Rivera-Jaimes <i>et al.</i> (2018) |                                    |

and insecticides (Meffe & de Bustamante 2014) and are the main source of pesticide contamination through surface runoff from agricultural areas and by means of wastewaters in urban areas (Cahill *et al.* 2011). Atrazine, the most commonly used corn herbicide in the United States (Lozier *et al.* 2012), has been detected in surface waters, (Byer *et al.* 2011; Kong *et al.* 2015; Székács *et al.* 2015). Glinski *et al.* (2018) reported the pesticide metolachlor is the most frequently detected in surface water from the wetlands of the USA. Lari *et al.* (2014) reported that the pesticide chlorpyrifos showed the highest concentration in the surface water of agriculture-intensive areas in Bhandara, India.

The concentrations in surface waters of the pesticides atrazine, metolachlor and chlorpyrifos are listed in Table 4.

### Hormones and antibiotics

Hormones and antibiotics are other compounds of emerging concern in water environments. The primary origin of steroidal hormones in the aquatic environment is human and animal defecation. In the long run, the natural and engineered hormones and their metabolites finally reach wastewater treatment plants (Barreiros *et al.* 2016; Gogoi *et al.* 2018). The hormone 17 $\beta$ -estradiol is an endogenous

**Table 3** | Occurrence of bisphenol A, nonylphenol and triclosan in different surface waters: main concentration and/or the highest concentration (in brackets)

| Compound    | Concentration (ng/L) | Surface water location                                     | Analytical methodology                    | Reference                  |
|-------------|----------------------|------------------------------------------------------------|-------------------------------------------|----------------------------|
| Bisphenol A | 83.9 (203.0)         | Langat River (Malaysia)                                    | SPE-GC-EI-MS                              | Santhi et al. (2012)       |
|             | (277.9)              | Gizdepka River (Poland)                                    | SPE-HPLC-FD                               | Staniszewska et al. (2015) |
|             | 25 (151)             | Jiyun, Hai, Dulu and Luann Rivers (China)                  | SPE-GC-MS/MS (tandem)                     | Kong et al. (2015)         |
|             | 62.3                 | River water (England)                                      | SPE-UHPLC-ESI-MS/MS (tandem)              | Petrie et al. (2016)       |
|             | 159                  | Hogsmill, Chertsey Bourne, and Blackwater Rivers (England) | SPE-HPLC-ESI-MS/MS (tandem)               | Wilkinson et al. (2017)    |
|             | (7)                  | Water of dams (Mexico)                                     | SPE-GC-EI-MS/MS (tandem)                  | Félix-Cañedo et al. (2013) |
|             | Nonylphenol          | 565 (2,622)                                                | Jiyun, Hai, Dulu and Luann Rivers (China) | SPE-GC-MS/MS (tandem)      |
| 50          |                      | Strymonas River (Greece)                                   | SPE-GC-EI-MS/MS (tandem)                  | Terzopoulou et al. (2015)  |
| (1,240)     |                      | Surface sea water of Amur Bay (Japan)                      | LL-HPLC-FD                                | Cherniaev et al. (2016)    |
| 109.22      |                      | Hai River (China)                                          | SPE-GC-EI-MS                              | Jin et al. (2013)          |
| 288.75      |                      | Yangtze River (China)                                      | SPE-GC-EI-MS                              | Jin et al. (2013)          |
| (655)       |                      | Water of dams (Mexico)                                     | SPE-GC-EI-MS/MS (tandem)                  | Félix-Cañedo et al. (2013) |
| Triclosan   | 96.3 (163)           | Grand River (Canada)                                       | SPE-LC-ESI-MS/MS                          | de Solla et al. (2016)     |
|             | 105                  | Dongjiang River (China)                                    | SPE-UHPLC-ESI-MS/MS (tandem)              | Yang et al. (2018)         |
|             | 1                    | Turia River (Spain)                                        | SPE-UHPLC-ESI-MS/MS (tandem)              | Carmona et al. (2014)      |
|             | 3.5                  | Liaohe River (China)                                       | SPE-GC-EI-MS                              | Bu et al. (2015)           |
|             | 101                  | River water (England)                                      | SPE-UHPLC-ESI-MS/MS (tandem)              | Petrie et al. (2016)       |
|             | 107.1                | River water (Spain)                                        | SPME-GC-EI-MS (tandem)                    | Regueiro et al. (2009)     |

**Table 4** | Occurrence of pesticides atrazine, metolachlor and chlorpyrifos in different surface waters: main concentration and/or the highest concentration (in brackets)

| Compound     | Concentration (ng/L) | Surface water location                                        | Analytical methodology     | Reference                    |
|--------------|----------------------|---------------------------------------------------------------|----------------------------|------------------------------|
| Atrazine     | 183 (1,829)          | Jiyun, Hai, Dulu and Luann Rivers (China)                     | SPE-GC-EI-MS/MS (tandem)   | Kong et al. (2015)           |
|              | (1,650)              | Wetland water (USA)                                           | SPE-GCxGC-MS (ToF)         | Glinski et al. (2018)        |
|              | 120 (3,910)          | Great Lakes (Canada)                                          | SPE-GC-EI-MS               | Byer et al. (2011)           |
|              | (15,000)             | Surface water (Hungary)                                       | SPE-GC-EI-MS               | Székács et al. (2015)        |
|              | (19)                 | Mijares River (Spain)                                         | SPE-UHPLC-ESI-MS (QToF)    | Pitarch et al. (2016)        |
|              | 130 (532)            | Surface water in rural area (China)                           | SPE-UHPLC-ESI-MS/MS        | Yu et al. (2018)             |
| Metolachlor  | 90 (1,830)           | Great Lakes (Canada)                                          | SPE-GC-EI-MS               | Byer et al. (2011)           |
|              | (20)                 | Landgraben, Rhine and Moselle Rivers and Tegel Lake (Germany) | LC-ESI-MS (tandem)         | Hermes et al. (2018)         |
|              | (10,500)             | Wetland water (USA)                                           | SPE-GCxGC-MS (ToF)         | Glinski et al. (2018)        |
|              | (56,000)             | Surface water (Hungary)                                       | SPE-GC-EI-MS               | Székács et al. (2015)        |
|              | 2,300                | Strymonas River (Greece)                                      | SPE-GC-EI-MS/MS (tandem)   | Terzopoulou et al. (2015)    |
|              | 348 (836)            | Water well (Brazil)                                           | SPE-GC-Nitrogen-phosphorus | Dores et al. (2008)          |
| Chlorpyrifos | (410)                | Surface water of agriculture area (India)                     | LLE-GC-MS                  | Lari et al. (2014)           |
|              | (3,700)              | Black Rascal Creek                                            | Not described              | Zhang et al. (2012)          |
|              | 9,310                | Lakes adjacent to agricultural fields (Bangladesh)            | LLE-HPLC-PAD               | Hossain et al. (2015)        |
|              | (729.5)              | Santa Clara River and Calleguas Creek (USA)                   | LLE-GC-ESI-MS (tandem)     | Delgado-Moreno et al. (2011) |
| Benfluralin  | (1,250)              | Wetland water (USA)                                           | SPE-GCxGC-MS (ToF)         | Glinski et al. (2018)        |
| Acetochlor   | (6,300)              | Surface water (Hungary)                                       | SPE-GC-EI-MS               | Székács et al. (2015)        |
|              | (166)                | Jiyun, Hai, Dulu and Luann Rivers (China)                     | SPE-GC-EI-MS/MS (tandem)   | Kong et al. (2015)           |

sex hormone, while the hormone 17 $\alpha$ -ethinylestradiol is a highly potent receptor agonist used in oral contraceptives (Laurenson et al. 2014).

Similar to hormones, antibiotics are introduced to the aquatic environment mainly through wastewater (Szekeres et al. 2017). Many studies on the occurrence of hormones

**Table 5** | Occurrence of the hormones 17 $\beta$ -estradiol and 17 $\alpha$ -ethinylestradiol and the antibiotics ciprofloxacin and erythromycin in different surface waters: main concentration and/or the highest concentration (in brackets)

| Compound                      | Concentration (ng/L) | Surface water location             | Analytical methodology       | Reference                      |
|-------------------------------|----------------------|------------------------------------|------------------------------|--------------------------------|
| 17 $\beta$ -estradiol         | 3,700                | Swart River (South Africa)         | SPE-UHPLC-PAD                | Olatunji <i>et al.</i> (2017)  |
|                               | 1.7                  | Pearl River (China)                | SPE-GC-EI-MS                 | Gong <i>et al.</i> (2009)      |
|                               | (56)                 | Piracicaba River (Brazil)          | SPE-HPLC-ESI-MS/MS (tandem)  | Torres <i>et al.</i> (2015)    |
|                               | 1.91                 | Pontchartrain Lake (USA)           | SPE-GC-MS                    | Wang <i>et al.</i> (2012)      |
|                               | (1.56)               | Yungang Lagoon (China)             | SPE-GC-MS                    | Zhang <i>et al.</i> (2011)     |
|                               | (19)                 | Streams in agricultural area (USA) | SPE-GC-MS                    | Velicu & Suri (2009)           |
| 17 $\alpha$ -ethinylestradiol | (100)                | Piracicaba River (Brazil)          | SPE-HPLC-ESI-MS/MS (tandem)  | Torres <i>et al.</i> (2015)    |
|                               | (0.43)               | Yungang Lagoon (China)             | SPE-GC-MS                    | Zhang <i>et al.</i> (2011)     |
| Ciprofloxacin                 | (1,168)              | Wiwi and Oda Rivers (Ghana)        | SPE-HPLC-MS/MS               | Azanu <i>et al.</i> (2018)     |
|                               | 1.55 (20)            | Llobregat River (Spain)            | SPE-UHPLC-ESI-MS/MS (tandem) | Osorio <i>et al.</i> (2016)    |
|                               | 1.12 (16.34)         | Ebro River (Spain)                 | SPE-UHPLC-ESI-MS/MS (tandem) | Osorio <i>et al.</i> (2016)    |
|                               | (740)                | Surface water (Costa Rica)         | SPE-HPLC-ESI-MS/MS (tandem)  | Spongberg <i>et al.</i> (2011) |
|                               | 5.8                  | Taihu Lake (Taiwan)                | SPE-HPLC-ESI-MS/MS (tandem)  | Lai <i>et al.</i> (2016)       |
|                               | (60.3)               | Baiyangdian Lake (China)           | SPE-HPLC-ESI-MS/MS (tandem)  | Li <i>et al.</i> (2012)        |
| Erythromycin                  | 1.85 (12.66)         | Llobregat River (Spain)            | SPE-UHPLC-ESI-MS/MS (tandem) | Osorio <i>et al.</i> (2016)    |
|                               | 1.29 (18.58)         | Ebro River (Spain)                 | SPE-UHPLC-ESI-MS/MS (tandem) | Osorio <i>et al.</i> (2016)    |
|                               | (1,149)              | Wiwi and Oda Rivers (Ghana)        | SPE-HPLC-MS                  | Azanu <i>et al.</i> (2018)     |
|                               | 183                  | Dongjiang River (China)            | SPE-UHPLC-ESI-MS/MS (tandem) | Yang <i>et al.</i> (2018)      |
|                               | 1.05                 | Grand River (Canada)               | SPE-PLC-ESI-MS/MS            | de Solla <i>et al.</i> (2016)  |
|                               | 3.4                  | Lunghu Lake (Taiwan)               | SPME-GC-EI-MS/MS (tandem)    | Lai <i>et al.</i> (2016)       |

in the aquatic environment (Torres *et al.* 2015; Olatunji *et al.* 2017) and antibiotics (Bu *et al.* 2013; Deo 2014; Burke *et al.* 2016; Azanu *et al.* 2018) have confirmed the presence of these compounds in surface waters. The concentration in surface waters of the hormones 17 $\beta$ -estradiol, 17 $\alpha$ -ethinylestradiol and the antibiotics ciprofloxacin and erythromycin are listed in Table 5.

## SOME NEW EMERGING CONTAMINANTS

As a consequence of increasing industrial activities, concern over new ECs has increased, for instance, from hydraulic fracturing (also called hydro-fracking or fracking) in which millions of gallons of water and additionally surfactants, sand and chemicals (including biocides) are injected by high pressure deep into the ground to fracture shales and extract gas into horizontally drilled wells (Richardson & Ternes 2018). The consequence of this polluting activity could be a new source of ECs in the aquatic environment, such as in surface waters.

Some other groups of contaminants are also emerging, for instance, manufactured nanoparticles and treatment

by-products. The challenge for the assessment of the environmental analysis of nanoparticles is in how to measure them because they cannot be filtered out using conventional processes (Sauvé & Desrosiers 2014). Regarding treatment by-products as from chlorination commonly used as disinfectant, a risk is posed as it may lead to formation of trihalomethanes and haloacetic acids (Fakour & Lo 2018).

## CONCLUSIONS

ECs have been detected in surface waters around the world, pharmaceuticals and PCPs being reported with the highest incidence in water bodies.

The techniques that have shown greatest extraction capacity for ECs are SPME and SPE, the latter being most used because of the good retention capacity of a wider polarity spectrum of analytes and less solvent consumption. Regarding chromatographic techniques, LC and GC are the most used techniques. Nevertheless, UHPLC should be mentioned as a recently reported and highly efficient technique in the detection of ECs since it allows improvement in the sensitivity and resolution of signals.



With regard to the detection of ECs, techniques have been used that couple to mass spectrometry due to its high sensitivity since the concentration of ECs in surface waters tends to be very low, although interestingly, detection by PAD has also been reported.

This review contains valuable information about ECs in surface waters and seeks to provide EC inventories in concise terms to the scientific community for the purposes of the analysis of ECs and drinking water management.

## ACKNOWLEDGEMENTS

The authors wish to express their gratitude for financial support from the National Council of Science and Technology (CONACYT) who supported this research through the grant projects PDCPN2014-01-248408 and CB2016 287242. The work team dedicates this review to the memory of their colleague Dr Alberto López-López (RIP).

## REFERENCES

- Agilent Technologies 2013 *Sample Preparation Fundamentals for Chromatography*. Agilent Technologies Inc., Canada.
- Agüera, A., Bueno, M. & Fernández-Alba, A. 2013 *New trends in the analytical determination of emerging contaminants and their transformation products in environmental waters*. *Environmental Science and Pollution Research* **20**, 3496–3515. DOI: 10.1007/s11356-013-1586-0.
- Afonso-Olivares, C., Torres-Padrón, E., Sosa-Ferrara, Z. & Santana-Rodríguez, J. 2013 *Assessment of the presence of pharmaceutical compounds in seawater samples from coastal area of Gran Canaria island (Spain)*. *Antibiotics* **2**, 274–287. DOI: 10.3390/antibiotics2020274.
- Alygizakis, N., Samanipour, S., Hollender, J., Ibáñez, M., Kaserzon, S., Vokkali, V., van Leerdam, J., Mueller, J., Pijnappels, M., Reid, M., Schymanski, E., Slobodnik, J., Thomaidis, N. & Thomas, K. 2018 *Exploring the potential of a global emerging contaminant early warning network through the use of retrospective suspect screening with high-resolution mass spectrometry*. *Environmental Science and Technology* **52**, 5135–5144. DOI: 10.1021/acs.est.8b00365.
- Aparicio, I., Martín, J., Santos, J., Malvar, J. & Alonso, E. 2017 *Stir bar sorptive extraction and liquid chromatography–tandem mass spectrometry determination of polar and non-polar emerging and priority pollutants in environmental waters*. *Journal of Chromatography A* **1500**, 43–52. DOI: 10.1016/j.chroma.2017.04.007.
- Azanu, D., Styrishave, B., Darko, G., Weisser, J. & Abaidoo, R. 2018 *Occurrence and risk assessment of antibiotics in water and lettuce in Ghana*. *Science of the Total Environment* **622–623**, 239–305. DOI: 10.1016/j.scitotenv.2017.111.287.
- Banerjee, S. & Mazumdar, S. 2012 *Electrospray ionization mass spectrometry: a technique to access the information beyond the molecular weight of the analyte*. *International Journal of Analytical Chemistry* **2012**, 282574. DOI: 10.1155/2012/282574.
- Barreiros, L., Queiroz, J., Magalhaes, L., Silva, A. & Segundo, M. 2016 *Analysis of 17- $\beta$ -estradiol and 17- $\alpha$ -ethinylestradiol in biological and environmental matrices – a review*. *Microchemical Journal* **126**, 243–262. DOI: 10.1016/j.microc.2015.12.003.
- Beceiro-González, E., Concha-Graña, E., Guimaraes, A., Gonçalves, C., Munitategui-Lorenzo, S. & Alpendurada, M. 2007 *Optimisation and validation of a solid-phase microextraction method for simultaneous determination of different types of pesticides in water by gas chromatography–mass spectrometry*. *Journal of Chromatography A* **1141**, 165–173. DOI: 10.1016/j.chroma.2006.12.042.
- Beek, T., Webber, F.-A., Bergmann, A., Hickmann, S., Ebert, I., Hein, A. & Küster, A. 2016 *Pharmaceuticals in the environment – global occurrences and perspectives*. *Environmental Toxicology and Chemistry* **35**, 823–835. DOI: 10.1002/etc.3339.
- Bu, Q., Wang, B., Huang, J., Deng, S. & Yu, G. 2013 *Pharmaceuticals and personal care products in the aquatic environment in China: a review*. *Journal of Hazardous Materials* **262**, 189–211. DOI: 10.1016/j.jhazmat.2013.08.040.
- Bu, Q., Luo, Q., Wang, D., Rao, K., Wang, Z. & Yu, G. 2015 *Screening for over 1000 organic micropollutants in surface water and sediments in the Liaohe River watershed*. *Chemosphere* **138**, 519–525. DOI: 10.1016/j.chemosphere.2015.07.013.
- Burke, V., Richter, D., Greskowiak, J., Mehrtens, A., Schulz, L. & Massmann, G. 2016 *Occurrence of antibiotics in surface and groundwater of a drinking water catchment area in Germany*. *Water Environment Research* **88**, 652–659. DOI: 10.2175/1061143016X14609975746604.
- Byer, J., Struger, J., Sverko, E., Klawunn, P. & Todd, A. 2011 *Spatial and seasonal variations in atrazine and metolachlor surface water concentrations in Ontario (Canada) using ELISA*. *Chemosphere* **82**, 1155–1160. DOI: 10.1016/j.chemosphere.2010.12.054.
- Cahill, M., Caprioli, G., Stack, M., Vittori, S. & James, K. 2011 *Semi-automated liquid chromatography–mass spectrometry (LC–MS/MS) method for basic pesticides in wastewater effluents*. *Analytical and Bioanalytical Chemistry* **400**, 587–594. DOI: 10.1007/s00216-011-4781-1.
- Calza, P., Medana, C., Padovano, E., Giancotti, V. & Minero, C. 2013 *Fate of selected pharmaceuticals in river waters*. *Environmental Science and Pollution Research* **20**, 2262–2270. DOI: 10.1007/s11356-012-1097-4.
- Carmona, E., Andreu, V. & Picó, Y. 2014 *Occurrence of acidic pharmaceuticals and personal care products in Turia River*

- Basin: from waste to drinking water. *Science of the Total Environment* **484**, 53–63. DOI: 10.1016/j.scitotenv.2014.02.085.
- Celle-Jeanton, H., Schemberg, D., Mohammed, N., Huneau, F., Bertrand, G., Lavastre, V. & Le Coustumer, P. 2014 Evaluation of pharmaceuticals in surface water: reliability of PECs compared to MECs. *Environment International* **73**, 10–21. DOI: 10.1016/j.envint.2014.06.015.
- Chauveau-Duriot, B., Doreau, M., Nozière, P. & Graulet, B. 2010 Simultaneous quantification of carotenoids, retinol, and tocopherols in forages, bovine plasma, and milk: validation of a novel UPLC method. *Analytical and Bioanalytical Chemistry* **397**, 777–790. DOI: 10.1007/s00216-010-3594-y.
- Cherniaev, A., Kondakova, A. & Zyk, E. 2016 Contents of 4-nonylphenol in surface sea water of Amur Bay (Japan/East sea). *Achievements in the Life Sciences* **10**, 65–71. DOI: 10.1016/j.als.2016.05.006.
- Chèvre, N. 2014 Pharmaceuticals in surface waters: sources, behavior, ecological risk, and possible solutions. Case study of Lake Geneva, Switzerland. *WIREs Water* **1**, 69–86. DOI: 10.1002/wat2.1006.
- Czarczyńska-Goślińska, B., Zgoła-Grześkowiak, A., Jeszka-Skowron, M., Frankowski, R. & Grześkowiak, T. 2017 Detection of bisphenol A, cumylphenol and parabens in surface waters of Greater Poland Voivodeship. *Journal of Environmental Management* **204**, 50–60. DOI: 10.1016/j.jenvman.2017.08.034.
- Deo, R. 2014 Pharmaceuticals in the surface water of the USA: a review. *Current Environmental Health Reports* **1**, 113–122. DOI: 10.1007/s40572-014-0015-y.
- Delgado-Moreno, L., Lin, K., Veiga-Nascimento, R. & Gan, J. 2011 Occurrence and toxicity of three classes of insecticides in water and sediment in two southern California coastal watersheds. *Journal of Agricultural and Food Chemistry* **59**, 9448–9456. DOI: 10.1021/jf202049s.
- De Gerónimo, E., Aparicio, V., Bárbaro, S., Portocarrero, R., Jaime, S. & Costa, J. 2014 Presence of pesticides in surface water from four sub-basins in Argentina. *Chemosphere* **107**, 423–431. DOI: 10.1016/j.chemosphere.2014.01.039.
- de Solla, S., Gilroy, E., Klinck, J., King, L., McInnis, R., Struger, J., Backus, S. & Gillis, P. 2016 Bioaccumulation of pharmaceuticals and personal care products in the unionid mussel *Lasmigona costata* in a river receiving wastewater effluent. *Chemosphere* **146**, 486–496. DOI: 10.1016/j.chemosphere.2015.12.022.
- Dores, E., Carbo, L., Ribeiro, M. & De-Lamonica-Freire, E. 2008 Pesticide levels in ground and surface waters of Primavera do Leste region, Mato Grosso, Brazil. *Journal of Chromatographic Science* **46**, 585–590. DOI: 10.1093/chromsci/46.7.585.
- Ebele, A., Abdallah, M. & Harrad, S. 2017 Pharmaceuticals and personal care products (PPCPs) in the freshwater aquatic environment. *Emerging Contaminants* **3** (1), 1–16. DOI: 10.1016/j.emcon.2016.12.004.
- Edjere, O., Asibor, I. & Otolu, S. 2016 Evaluation of the levels of phthalate ester plasticizers in surface water of Ethiope River system, Delta State, Nigeria. *Journal of Applied Sciences and Environmental Management* **20**, 608–614. DOI: 10.4314/jasem.v20i3.15.
- Edwards, M., Mostafa, A. & Górecki, T. 2011 Modulation in comprehensive two-dimensional gas chromatography: 20 years of innovation. *Analytical and Bioanalytical Chemistry* **401**, 2335–2349. DOI: 10.1007/s00216-011-5100-6.
- El-Gawad, H. 2016 Validation method of organochlorine pesticides residues in water using gas chromatography–quadrupole mass. *Water Science* **30**, 96–107. DOI: 10.1016/j.wsj.2016.10.001.
- Fakour, H. & Lo, S. 2018 Formation of trihalomethanes as disinfection byproducts in herbal spa pools. *Scientific Reports* **8**, 5709. DOI: 10.1038/s41598-018-23975-2.
- Félix-Cañedo, T., Durán-Álvarez, J. & Jiménez-Cisneros, B. 2013 The occurrence and distribution of a group of organic micropollutants in Mexico City's water sources. *Science of the Total Environment* **454–455**, 109–118. DOI: 10.1016/j.scitotenv.2013.02.088.
- Gago-Ferrero, P., Gros, M., Ahrens, L. & Wiberg, K. 2017 Impact of on-site, small and large scale wastewater treatment facilities on levels and fate of pharmaceuticals, personal care products, artificial sweeteners, pesticides, and perfluoroalkyl substances in recipient waters. *Science of the Total Environment* **601–602**, 1289–1297. DOI: 10.1016/j.scitotenv.2017.05.258.
- Gani, K. & Kazmi, A. 2016 Contamination of emerging contaminants in Indian aquatic sources: first overview of the situation. *Journal of Hazardous, Toxic, and Radioactive Waste* **21** (3), 1–12. DOI: 10.1016/(ASCE)HZ.2153-5515.0000348.
- Gliniski, D., Purucker, S., Van Meter, R., Black, M. & Henderson, M. 2018 Analysis of pesticides in surface water, stemflow, and throughfall in an agricultural area in South Georgia, USA. *Chemosphere* **209**, 496–507. DOI: 10.1016/j.chemosphere.2018.06.116.
- Gogoi, A., Mazumder, P., Tyagi, V., Chaminda, G., An, A. & Kumar, M. 2018 Occurrence and fate of emerging contaminants in water environment: a review. *Groundwater for Sustainable Development* **6**, 169–180. DOI: 10.1016/j.gsd.2017.12.009.
- Gómez, M., Herrera, S., Solé, D., García-Calvo, E. & Fernández-Alba, A. 2011 Automatic searching and evaluation of priority and emerging contaminants in wastewater and river water by stir bar sorptive extraction followed by comprehensive two-dimensional gas chromatography-time-to-flight spectrometry. *Analytical Chemistry* **83**, 2638–2647. DOI: 10.1021/sc102909g.
- Gong, J., Ran, Y., Chen, D., Yang, Y. & Ma, X. 2009 Occurrence and environmental risk of endocrine-disrupting chemicals in surface waters of the Pearl River, South China. *Environmental Monitoring and Assessment* **156**, 199–210. DOI: 10.1007/s10661-008-0474-4.

- Gros, M., Rodríguez-Mozaz, S. & Barceló, D. 2012 Fast and comprehensive multi-residue analysis of a broad range of human and veterinary pharmaceuticals and some of their metabolites in surface and treated waters by ultra-high-performance liquid chromatography coupled to quadrupole-linear ion trap tandem mass spectrometry. *Journal of Chromatography A* **1248**, 104–121. DOI: 10.1016/j.chroma.2012.05.084.
- Gros, M., Rodríguez-Mozaz, S. & Barceló, D. 2013 Rapid analysis of multiclass antibiotic residues and some of their metabolites in hospital, urban wastewater and river water by ultra-high-performance liquid chromatography coupled to quadrupole-linear ion trap tandem mass spectrometry. *Journal of Chromatography A* **1292**, 173–188. DOI: 10.1016/j.chroma.2012.12.072.
- Guillarme, D., Nguyen, D., Rudaz, S. & Veuthey, J.-L. 2007 Recent developments in liquid chromatography – impact on qualitative and quantitative performance. *Journal of Chromatography A* **1149**, 20–29. DOI: 10.1016/j.chroma.2006.11.014.
- Guo, Y., Wang, L. & Kannan, K. 2013 Phthalates and parabens in personal care products from China: concentrations and human exposure. *Archives of Environmental Contamination and Toxicology* **66** (1), 113–119. DOI: 10.1007/s00244-013-9937-x.
- Hao, C., Lissemore, L., Nguyen, B., Kleywegt, S., Yang, P. & Solomon, K. 2006 Determination of pharmaceuticals in environmental waters by liquid chromatography/electrospray ionization/tandem mass spectrometry. *Analytical and Bioanalytical Chemistry* **384**, 505–513. DOI: 10.1007/s00216-005-0199-y.
- Hartmann, J., van der Aa, M., Wuijts, S., de Roda Husman, A. & van der Hoek, J. 2018 Risk governance of potential emerging risks to drinking water quality: analysing current practices. *Environmental Science and Policy* **84**, 97–104. DOI: 10.1016/j.envsci.2018.02.015.
- Hermes, N., Jewell, K., Wick, A. & Ternes, T. 2018 Quantification of more than 150 micropollutants including transformation products in aqueous samples by liquid chromatography-tandem mass spectrometry using scheduled multiple reaction monitoring. *Journal of Chromatography A* **1531**, 64–73. DOI: 10.1016/j.chroma.2017.11.020.
- Hernández, F., Ibañez, M., Bade, R., Bijlsma, L. & Sancho, J. 2014 Investigation of pharmaceuticals and illicit drugs in waters by liquid chromatography-high-resolution mass spectrometry. *Trends in Analytical Chemistry* **63**, 140–157. DOI: 10.1016/j.trac.2014.08.003.
- Ho, C., Lam, C., Chan, M., Cheung, R., Law, L., Lit, L., Ng, K., Suen, M. & Tai, H. 2003 Electrospray ionisation mass spectrometry: principles and clinical applications. *Clinical Biochemist Reviews* **24**, 3–12.
- Hossain, M., Chowdhury, M., Pramanik, M., Rahman, M., Fakhruddin, A. & Alam, M. 2015 Determination of selected pesticides in water samples adjacent to agricultural fields and removal of organophosphorus insecticide chlorpyrifos using soil bacterial isolates. *Applied Water Science* **5** (2), 171–179. DOI: 10.1007/s13201-014-0178-6.
- Jin, X., Wang, Y., Jin, W., Rao, K., Giesy, J., Hollert, H., Richardson, K. & Wang, Z. 2013 Ecological risk of nonylphenol in China surface waters based on reproductive fitness. *Environmental Science and Technology* **48**, 1256–1262. DOI: 10.1021/es403781z.
- John, V., Jain, P., Rahate, M. & Labhasetwar, P. 2014 Assessment of deterioration in water quality from source to household storage in semi-urban settings of developing countries. *Environmental Monitoring and Assessment* **186**, 725–734. DOI: 10.1007/s10661-013-3412-z.
- Jover, E., Matamoros, V. & Bayona, J. 2009 Characterization of benzothiazoles, benzotriazoles and benzosulfonamides in aqueous matrixes by solid-phase extraction followed by comprehensive two-dimensional gas chromatography coupled to time-of-flight mass spectrometry. *Journal of Chromatography A* **1216**, 4013–4019. DOI: 10.1016/j.chroma.2009.02.052.
- Kabir, A., Mesa, R., Jurmain, J. & Furton, K. 2017 Fabric phase sorptive extraction explained. *Separations* **4**, 21. DOI: 10.3390/separations4020021.
- Kanani, H., Chrysanthopoulos, P. & Klapa, M. 2008 Standardizing GC-MS metabolomics. *Journal of Chromatography B* **871**, 191–201. DOI: 10.1016/j.chromb.2008.04.049.
- Kong, L., Kadokami, K., Wang, S., Duong, H. & Chau, H. 2015 Monitoring of 1300 organic micro-pollutants in surface waters from Tianjin, North China. *Chemosphere* **122**, 125–130. DOI: 10.1016/j.chemosphere.2014.11.025.
- Kosma, C., Lambropoulou, D. & Albanis, T. 2014 Investigation of PPCPs in wastewater treatment plants in Greece: occurrence, removal and environmental risk assessment. *Science of the Total Environment* **466–467**, 421–438. DOI: 10.1016/j.scitotenv.2013.07.044.
- Lai, W., Lin, Y., Tung, H., Lo, S. & Lin, A. 2016 Occurrence of pharmaceuticals and perfluorinated compounds and evaluation of the availability of reclaimed water in Kinmen. *Emerging Contaminants* **2**, 135–144. DOI: 10.1016/j.emcon.2016.05.001.
- Lari, S., Khan, N., Ghandi, K., Meshram, T. & Thacker, N. 2014 Comparison of pesticide residues in surface water and ground water of agriculture intensive areas. *Journal of Environmental Health Science & Engineering* **12**, 11. DOI: 10.1186/2052-336X-12-11.
- Laurenson, J., Bloom, R., Page, S. & Sadrieh, N. 2014 Ethinyl estradiol and other pharmaceutical estrogens in the aquatic environment: a review of recent risk assessment data. *The AAPS Journal* **16**, 299–310. DOI: 10.1208/s12248-014-9561-3.
- Leonhardt, J., Teutenberg, T., Tuerk, J., Schlüsener, M., Ternes, T. & Schmidt, T. 2015 A comparison of one-dimensional and microscale two-dimensional liquid chromatographic approaches coupled to high resolution mass spectrometry for the analysis of complex samples. *Analytical Methods* **7**, 7697–7706. DOI: 10.1039/c5ay01143d.



- Li, W., Shi, Y., Gao, L., Liu, J. & Cai, Y. 2012 Occurrence of antibiotics in water, sediments, aquatic plants, and animals from Baiyangdian Lake in North China. *Chemosphere* **89**, 1307–1315. DOI: 10.1016/j.chemosphere.2012.05.079.
- Lozier, M., Curwin, B., Nishioka, M. & Sanderson, W. 2012 Determinants of atrazine contamination in the homes of commercial pesticide applicators across time. *Journal of Occupational and Environmental Hygiene* **9**, 289–297. DOI: 10.1080/15459624.2012.668658.
- Luo, Y., Guo, W., Ngo, H., Nghiem, L., Hai, F., Zhang, J., Liang, S. & Wang, X. 2014 A review on the occurrence of micropollutants in the aquatic environment and their fate and removal during wastewater treatment. *Science of the Total Environment* **473–474**, 619–641. DOI: 10.1016/j.scitotenv.2013.12.065.
- Lyndall, J., Fuchsman, P., Bock, M., Barber, T., Lauren, D., Leigh, K., Perruchon, E. & Capdevielle, M. 2010 Probabilistic risk evaluation for triclosan in surface water, sediments and aquatic biota tissues. *Integrated Environmental Assessment and Management* **6** (3), 419–440. DOI: 10.1897/ieam\_2009-072.1.
- Ma, R., Wang, B., Lu, S., Zhang, Y., Yin, L., Huang, J., Deng, S., Wang, Y. & Yu, G. 2016 Characterization of pharmaceutically active compounds in Dongting Lake, China: occurrence, chiral profiling and environmental risk. *Science of the Total Environment* **557–558**, 268–275. DOI: 10.1016/j.scitotenv.2016.03.053.
- Mao, Z., Zheng, X., Zhang, Y., Tao, X., Li, Y. & Wang, W. 2012 Occurrence and biodegradation of nonylphenol in the environment. *International Journal of Molecular Sciences* **13**, 491–505. DOI: 10.3390/ijms13010491.
- Margot, J., Rossi, L., Barry, D. & Holliger, C. 2015 A review of the fate of micropollutants in wastewater treatment plants. *WIREs Water* **2**, 457–487. DOI: 10.1002/wat2.1090.
- McAvoy, D., Schatowitz, B., Jacob, M., Hauk, A. & Eckhoff, W. 2002 Measurement of triclosan in wastewater treatment systems. *Environmental Toxicology and Chemistry* **21**, 1323–1329. DOI: 10.1002/etc.5620210701.
- Meffe, R. & de Bustamante, I. 2014 Emerging organic contaminants in surface water and groundwater: a first overview of the situation in Italy. *Science of the Total Environment* **481**, 280–295. DOI: 10.1016/j.scitotenv.2014.02.053.
- Meierjohann, A., Brozinski, J.-M. & Kronberg, L. 2016 Seasonal variation of pharmaceutical concentrations in a river/lake system in eastern Finland. *Environmental Science: Processes & Impacts* **18** (3), 342–349. DOI: 10.1039/c5em00505a.
- Munz, N., Burdon, F., de Zwart, D., Junghans, M., Melo, L., Reyes, M., Schönenberger, U., Singer, H., Spycher, B., Hollender, J. & Stamm, C. 2017 Pesticides drive risk of micropollutants in wastewater-impacted streams during low flow conditions. *Water Research* **110**, 366–377. DOI: 10.1016/j.watres.2016.11.001.
- Nannou, C., Kosma, C. & Albanis, T. 2015 Occurrence of pharmaceuticals in surface waters: analytical method development and environmental risk assessment. *International Journal of Environmental Analytical Chemistry* **95** (13), 1242–1262. DOI: 10.1080/03067319.2015.1085520.
- Nishi, I., Kawakami, T. & Onodera, S. 2008 Monitoring of triclosan in the surface water of the Tone Canal, Japan. *Bulletin of Environmental Contamination and Toxicology* **80**, 163–166. DOI: 10.1007/s00128-007-9338-9.
- Olatunji, O., Fatoki, O., Opeolu, B., Ximba, B. & Chitongo, R. 2017 Determination of selected steroid hormones in some surface water around animal farms in Cape Town using HPLC-DAD. *Environmental Monitoring and Assessment* **189**, 363. DOI: 10.1007/s10661-017-6070-8.
- Organtini, K., Myers, A., Jobst, K., Cochran, J., Ross, B., McCarry, B., Reiner, E. & Dorman, F. 2014 Comprehensive characterization of the halogenated dibenzo-p-dioxin and dibenzofuran contents of residential fire debris using comprehensive two-dimensional gas chromatography coupled to time of flight mass spectrometry. *Journal of Chromatography A* **1369**, 138–146. DOI: 10.1016/j.chroma.2014.09.088.
- Osorio, V., Marcé, R., Pérez, S., Ginebrada, A., Cortina, J. & Barceló, D. 2012 Occurrence and modeling of pharmaceuticals on a sewage-impacted Mediterranean river and their dynamics under different hydrological conditions. *Science of the Total Environment* **440**, 3–13. DOI: 10.1016/j.scitotenv.2012.08.040.
- Osorio, V., Larrañaga, A., Aceña, J., Pérez, S. & Barceló, D. 2016 Concentration and risk of pharmaceuticals in freshwater systems are related to the population density and the livestock units in Iberian Rivers. *Science of the Total Environment* **540**, 267–277. DOI: 10.1016/j.scitotenv.2015.06.143.
- Paíga, P., Santos, L., Ramos, S., Jorge, S., Silva, J. & Delerue-Matos, C. 2016 Presence of pharmaceuticals in the Lis river (Portugal): sources, fate and seasonal variation. *Science of the Total Environment* **573**, 164–177. DOI: 10.1016/j.scitotenv.2016.08.089.
- Pawliszyn, J. 2012 *Handbook of Solid Phase Microextraction*. Elsevier, Waltham, MA, USA.
- Petrie, B., Barden, R. & Kazprzyk-Hordern, B. 2015 A review on emerging contaminants in wastewaters and the environment: current knowledge, understudied areas and recommendations for future monitoring. *Water Research* **72**, 3–27. DOI: 10.1016/j.watres.2014.08.053.
- Petrie, B., Youdan, J., Barden, R. & Kasprzyk-Hordern, B. 2016 Multi-residue analysis of 90 emerging contaminants in liquid and solid environmental matrices by ultra-high-performance liquid chromatography tandem mass spectrometry. *Journal of Chromatography A* **1431**, 64–78. DOI: 10.1016/j.chroma.2015.12.036.
- Petrovic, M. & Barceló, D. 2013 Liquid chromatography–tandem mass spectrometry. *Analytical and Bioanalytical Chemistry* **405**, 5857–5858. DOI: 10.1007/s00216-013-7018-7.
- Picó, Y. & Barceló, D. 2015 Transformation products of emerging contaminants in the environment and high-resolution mass

- spectrometry: a new horizon. *Analytical and Bioanalytical Chemistry* **407**, 6257–6273. DOI: 10.1007/s00216-015-8739-6.
- Pitarch, E., Cervera, M., Portolés, T., Ibañez, M., Barreda, M., Renau-Pruñonosa, A., Morell, I., López, F., Albarrán, F. & Hernández, F. 2016 Comprehensive monitoring of organic micro-pollutants in surface and groundwater in the surrounding of a solid-waste treatment plant of Castellón, Spain. *Science of the Total Environment* **548–549**, 211–220. DOI: 10.1016/j.scitotenv.2015.12.166.
- Prebhalo, S., Brockman, A., Cochran, J. & Dorman, F. 2015 Determination of emerging contaminants in wastewater utilizing comprehensive two-dimensional gas-chromatography coupled with time-of-flight mass spectrometry. *Journal of Chromatography A* **1419**, 109–115. DOI: 10.1016/j.chroma.2015.09.080.
- Reemtsma, T. & Quintana, J. 2006 Analytical methods for polar pollutants. In: *Organic Pollutants in the Water Cycle* (T. Reemtsma & M. Jekel, eds), Wiley, Weinheim, Germany, pp. 1–40. DOI: 10.1002/352760877X.ch1.
- Regueiro, J., Becerril, E., Garcia-Jares, C. & Llompert, M. 2009 Trace analysis of parabens, triclosan and related chlorophenols in water by headspace solid-phase microextraction with in situ derivatization and gas chromatography–tandem mass spectrometry. *Journal of Chromatography A* **1216**, 4693–4702. DOI: 10.1016/j.chroma.2009.04.025.
- Renz, L., Volz, C., Michanowicz, D., Ferrar, K., Christian, C., Lenzner, D. & El-Hefnawy, T. 2013 A study of parabens and bisphenol A in surface water and fish brain tissue from the Greater Pittsburgh Area. *Ecotoxicology* **22**, 632–641. DOI: 10.1007/s10646-013-1054-0.
- Richardson, S. & Ternes, T. 2018 Water analysis: emerging contaminants and current issues. *Analytical Chemistry* **90**, 398–428. DOI: 10.1021/ac9008012.
- Riva, F., Castiglioni, S., Fattore, E., Manenti, A., Davoli, E. & Zuccato, E. 2018 Monitoring emerging contaminants in the drinking water of Milan and assessment of the human risk. *International Journal of Hygiene and Environmental Health* **221**, 451–457. DOI: 10.1016/j.ijheh.2018.01.008.
- Rivera-Jaimes, J., Postigo, C., Melgoza-Alemán, R., Aceña, J., Barceló, D. & de Alda, M. 2018 Study of pharmaceuticals in surface and wastewater from Cuernavaca, Morelos, Mexico: occurrence and environmental risk assessment. *Science of the Total Environment* **613–614**, 1263–1274. DOI: 10.1016/j.scitotenv.2017.09.134.
- Rodriguez-Lafuente, A., Piri-Moghadam, H., Lord, H., Obal, T. & Pawliszyn, J. 2016 Inter-laboratory validation of automated SPME-GC/MS for determination of pesticides in surface and ground water samples: sensitive and green alternative to liquid–liquid extraction. *Water Quality Research Journal of Canada* **51** (4), 331–343. DOI: 10.2166/wqrj.2016.011.
- Rosen, R. 2007 Mass spectrometry for monitoring micropollutants in water. *Current Opinion in Biotechnology* **18**, 246–251. DOI: 10.1016/j.copbio.2007.03.005.
- Salvatierra-Stamp, V., Ceballos-Magaña, S., Gonzalez, J., Jurado, J. & Muñoz-Valencia, R. 2015 Emerging contaminant determination in water samples by liquid chromatography using a monolithic column coupled with a photodiode array detector. *Analytical and Bioanalytical Chemistry* **407**, 4661–4670. DOI: 10.1007/s00216-015-8666-6.
- Santhi, V., Sakai, N., Ahmad, E. & Mustafa, A. 2012 Occurrence of bisphenol A in surface water, drinking water and plasma from Malaysia with exposure assessment from consumption of drinking water. *Science of the Total Environment* **427–428**, 332–338. DOI: 10.1016/j.scitotenv.2012.04.041.
- Sauvé, S. & Desrosiers, M. 2014 A review of what is an emerging contaminant. *Chemistry Central Journal* **8**, 15. DOI: 10.1186/1752-153X-8-15.
- Selvaraj, K., Sundaramoorthy, G., Ravichandran, P., Girijan, G., Sampath, S. & Ramaswamy, B. 2015 Phthalate esters in water and sediments of the Kaveri River, India: environmental levels and ecotoxicological evaluations. *Environmental Geochemistry and Health* **37**, 83–96. DOI: 10.1007/s10653-014-9632-5.
- Spongberg, A., Witter, J., Acuña, J., Vargas, J., Murillo, M., Umaña, G., Gómez, E. & Perez, G. 2011 Reconnaissance of selected PPCP compounds in Costa Rican surface waters. *Water Research* **45**, 6709–6717. DOI: 10.1016/j.watres.2011.10.004.
- Staniszewska, M., Koniecko, I., Falkowska, L. & Krzymyk, E. 2015 Occurrence and distribution of bisphenol A and alkylphenols in the water of the gulf of Gdansk (Southern Baltic). *Marine Pollution Bulletin* **91**, 372–379. DOI: 10.1016/j.marpolbul.2014.11.027.
- Székács, A., Mörtl, M. & Darvas, B. 2015 Monitoring pesticide residues in surface and ground water in Hungary: surveys in 1990–2015. *Journal of Chemistry* **2015**, 717948. DOI: 10.1155/2015/717948.
- Szekeres, E., Baricz, A., Chiriac, C., Farkas, A., Opris, O., Soran, M.-L., Andrei, A.-S., Kudi, K., Balcázar, J., Dragos, N. & Coman, C. 2017 Abundance of antibiotics, antibiotic resistance genes and bacterial community composition in wastewater effluents from different Romanian hospitals. *Environmental Pollution* **225**, 304–315. DOI: 10.1016/j.envpol.2017.01.054.
- Terzopoulou, E., Voutsas, D. & Kaklamanos, G. 2015 A multi-residue method for determination of 70 organic micropollutants in surface waters by solid-phase extraction followed by gas chromatography coupled to tandem mass spectrometry. *Environmental Science and Pollution Research* **22**, 1095–1112. DOI: 10.1007/s11356-014-3397-3.
- Torres, N., Aguiar, M., Ferreira, L., Américo, J., Machado, Â., Cavalcanti, E. & Tornisiello, V. 2015 Detection of hormones in surface and drinking water in Brazil by LC-ESI-MS/MS and ecotoxicological assessment with *Daphnia magna*. *Environmental Monitoring and Assessment* **187**, 379. DOI: 10.1007/s10661-015-4626-z.
- Tran, N., Reinhard, M. & Gin, K. 2018 Occurrence and fate of emerging contaminants in municipal wastewater treatment



- plants from different geographical regions: a review. *Water Research* **133**, 182–207. DOI: 10.1016/j.watres.2017.12.029.
- Tranchida, P., Purcaro, G., Dugo, P. & Mondello, L. 2011 Modulators for comprehensive two-dimensional gas chromatography. *TrAC Trends in Analytical Chemistry* **30**, 1437–1461. DOI: 10.1016/j.trac.2011.06.010.
- USEPA (US Environmental Protection Agency) 2007 *Method 3535A (SW-846), Solid-Phase Extraction*. USEPA, Washington, DC, USA.
- Velicu, M. & Suri, R. 2009 Presence of steroid hormones and antibiotics in surface water of agricultural, suburban and mixed-use areas. *Environmental Monitoring and Assessment* **154**, 349–359. DOI: 10.1007/s10661-008-0402-7.
- Wanda, E., Nyoni, H., Mamba, B. & Msagati, T. 2017 Occurrence of emerging micropollutants in water systems in Gauteng, Mpumalanga and north west provinces, South Africa. *Environmental Research and Public Health* **14**, 79. DOI: 10.3390/ijerph14010079.
- Wang, C., Shi, H., Adams, C., Gamagedara, S., Stayton, I., Timmons, T. & Ma, Y. 2011 Investigation of pharmaceuticals in Missouri natural and drinking water using high performance liquid chromatography-tandem mass spectrometry. *Water Research* **45**, 1818–1828. DOI: 10.1016/j.watres.2010.11.043.
- Wang, G., Ma, P., Zhang, Q., Lewis, J., Lacey, M., Furukawa, Y., O'Reilly, S., Meaux, S., McLachlan, J. & Zhang, S. 2012 Endocrine disrupting chemicals in New Orleans surface waters and Mississippi Sound sediments. *Journal of Environmental Monitoring* **14** (5), 1353–1364. DOI: 10.1039/c2em30095h.
- Wang, X., Lou, X., Zhang, N., Ding, G., Chen, Z., Xu, P., Wu, L., Cai, J., Han, J. & Qiu, X. 2015 Phthalate esters in main source water and drinking water of Zhejiang Province (China): distribution and health risks. *Environmental Toxicology and Chemistry* **34**, 2205–2212. DOI: 10.1002/etc.3065.
- WHO (World Health Organization) 2006 *Health Aspects of Plumbing*. WHO, Geneva, Switzerland.
- WHO (World Health Organization) 2016 *Protecting Surface Water for Health: Identifying, Assessing and Managing Drinking-Water Quality Risks in Surface-Water Catchments*. WHO, Geneva, Switzerland.
- Wilkinson, J., Hooda, P., Swinden, J., Barker, J. & Barton, S. 2017 Spatial distribution of organic contaminants in three rivers of Southern England bound to suspended particulate material and dissolved in water. *Science of the Total Environment* **593–594**, 487–497. DOI: 10.1016/j.scitotenv.2017.03.167.
- Wilm, M. 2011 Principles of electrospray ionization. *Molecular & Cellular Proteomics* **10** (7), M111.009407. DOI: 10.1074/mcp.R111.009407.
- Wu, Z., Zhang, D., Cai, Y., Wang, X., Zhang, L. & Chen, Y. 2017 Water quality assessment based on the water quality index method in Lake Poyang: the largest freshwater lake in China. *Scientific Reports* **7**, 17999. DOI: 10.1038/s41598-017-18285-y.
- Yamamoto, H., Tamura, I., Hirata, Y., Kato, J., Kagota, K., Katsuki, S., Yamamoto, A., Kagami, Y. & Tatarazako, N. 2011 Aquatic toxicity and ecological risk assessment of seven parabens: individual and additive approach. *Science of the Total Environment* **410–411**, 102–111. DOI: 10.1016/j.scitotenv.2011.09.040.
- Yang, Y., Zhao, J., Liu, Y., Liu, W., Zhang, Q., Yao, L., Hu, L., Zhang, J., Jiang, Y. & Ying, G. 2018 Pharmaceuticals and personal care products (PPCPs) and artificial sweeteners (ASs) in surface and ground waters and their application as indication of wastewater contamination. *Science of the Total Environment* **616–617**, 816–823. DOI: 10.1016/j.scitotenv.2017.10.241.
- Yu, J., Bian, Z., Tian, X., Zhang, J., Zhang, R. & Zheng, H. 2018 Atrazine and its metabolites in surface water and well waters in rural area and its human and ecotoxicological risk assessment of Henan province, China. *Human and Ecological Risk Assessment* **24**, 1–13. DOI: 10.1080/10807039.2017.1311768.
- Zhang, X., Gao, Y., Li, Q., Li, G., Guo, Q. & Yan, C. 2011 Estrogenic compounds and estrogenicity in surface water, sediments, and organisms from Yundang Lagoon in Xiamen, China. *Archives of Environmental Contamination and Toxicology* **61**, 93–100. DOI: 10.1007/s00244-010-9588-0.
- Zhang, X., Starnner, K. & Spurlock, F. 2012 Analysis of chlorpyrifos agricultural use in regions of frequent surface water detections in California, USA. *Bulletin of Environmental Contamination and Toxicology* **89**, 978–984. DOI: 10.1007/s00128-012-0791-8.

First received 25 November 2018; accepted in revised form 27 May 2019. Available online 10 June 2019
